# Supplementary material for: Body mass index and subjective well-being in young adults: a twin population study
Source: PubMed Central journal article supplement (PMC3691623; doi:10.1186/1471-2458-13-231), 2013-03-16

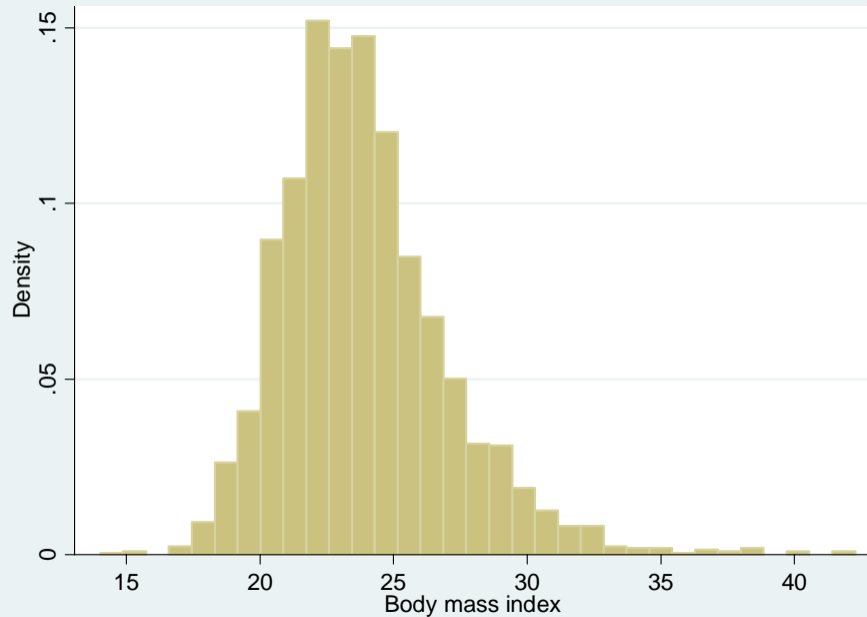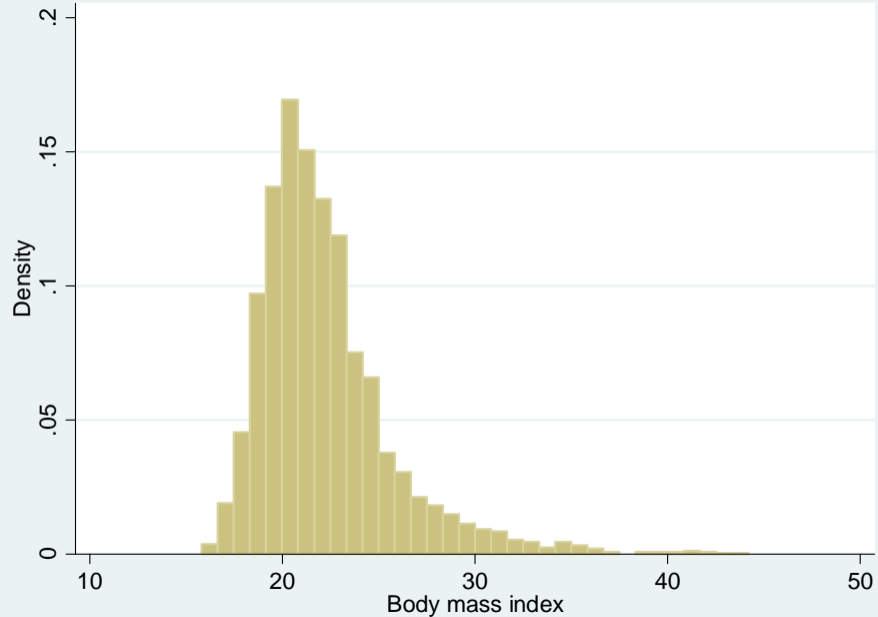

Supplement: 1471-2458-13-231-S1.pdf [file 1471-2458-13-231-S1.pdf]
